# Supplementary material
Source: Frontiers journal article supplement (https://www.frontiersin.org/articles/545967)
Supplement: Data_Sheet_1.pdf [file Data_Sheet_1.pdf]

## Supplementary Material

### **Salinity intrusion in a modified river-estuary system: an integrated modeling framework for source-to-sea management**

#### **S1: Required River Discharges**

The focus here was on low discharge conditions during which salinity extends farther upstream so the model was run with fixed values of river discharges  $Q_r = 75\text{m}^3\text{s}^{-1}$ ,  $150\text{m}^3\text{s}^{-1}$ , and  $300\text{m}^3\text{s}^{-1}$  for 50 days after reaching an equilibrium to incorporate a representative range of tidal forcing (Fig. S1). Solutions for salinity intrusions  $L_x$  were obtained for each discharge case, with the range of  $L_x$  for a given discharge due to tidal fluctuations. A relationship between intrusions and discharges was approximated by a power law,  $L_x = \beta Q_r^\gamma$ , where  $\beta$  and  $\gamma$  were parameters that governed the fit (Abood 1974; Monismith *et al.* 2002). The fitted relationship was used to calculate a river discharge  $\hat{Q}_r$  that satisfied  $\Pr(L_x \geq 120\text{km}) = \delta$ . (Equivalently, a river discharge equating to an exceedance of the salinity threshold at Poughkeepsie,  $\delta\%$  of the time was calculated.) The estimator was:

$$\hat{Q}_r = \left( \frac{120 - \Phi(1-\delta)\hat{\sigma}}{\hat{\beta}} \right)^{\frac{1}{\hat{\gamma}}}$$

where  $\hat{\beta}$  and  $\hat{\gamma}$  are least squares estimates,  $\hat{\sigma}$  is an estimated residual variance, and  $\Phi(1 - \delta)$  is the value of the standard normal distribution for which  $\delta\%$  of the model solutions for  $L_x$  have been exceeded at Poughkeepsie.

A  $(1 - \alpha)$  confidence interval for  $Q_r$  can be found through a non-parametric bootstrap (Davison and Hinkley 1997).  $n_i, i = 1, \dots, m$ , values were sampled with replacement from the salinity intrusions  $L_x$  associated with each of the  $m$  flows from the model runs. The power law was fitted to the bootstrapped dataset, and  $\hat{Q}^*$  was estimated. This procedure was repeated a large number of times, and the estimated values of  $\hat{Q}^*$  were ordered. An approximate confidence in-

terval for  $Q$  was found by selecting the values of  $\widehat{Q}^*$  that satisfied  $\alpha/2$  and  $(1 - \alpha/2)$  percentiles.

## S2: Extreme-Value Theory Methodology

Consider the following representation. Let  $Z_n = \max\{X_1, \dots, X_n\}$ , where  $X_1, \dots, X_n$  are a series of independent random variables with a common distribution function,  $F$ . The  $X_i$ 's represent the daily river flow data, and  $Z_n$  corresponds to the maximum daily flow over  $n$  time units. If  $n$  equals 365, then  $Z_n$  represents the annual maximum. Further, if the data are blocked into  $m$  sequences of length  $n$ , generating a sequence of block maxima,  $Z_{n,1}, \dots, Z_{n,m}$ , then a Generalized Extreme Value (GEV) distribution can be fitted.

The GEV distribution has the form:

$$G(z) = \exp\{-[1 + \xi \left(\frac{z-\mu}{\sigma}\right)]^{-1/\xi}\}$$

defined on the set  $\{z: 1 + \frac{\xi(z-\mu)}{\sigma} > 0\}$  where  $-\infty < \mu < \infty$ ,  $-\infty < \xi < \infty$ , and  $\sigma > 0$ . The model comprises a location parameter,  $\mu$ , a scale parameter,  $\sigma$ , and a shape parameter,  $\xi$ . The GEV distribution corresponds to the Frèchet family for  $\xi < 0$ , the Gumbel family for  $\xi = 0$ , and the Weibull family for  $\xi > 0$ . The flexibility of the GEV distribution means that the user need not select one of these three distributions *a priori*, instead allowing the data to determine the most appropriate form.

From the fitted distribution, a return level

$$z_p = \begin{cases} \mu - \frac{\sigma}{\xi} [1 - \{-\log(1-p)\}^{-\xi}], & \text{for } \xi \neq 0 \\ \mu - \sigma \log\{-\log(1-p)\}, & \text{for } \xi = 0 \end{cases}$$

is found with an associated return period. The level  $z_p$  is exceeded by the annual maximum in any particular year with probability  $p$ , implying a return period of  $1/p$  years.

The parameters of the GEV are estimated by maximum likelihood, the log-likelihood for the GEV when  $\xi \neq 0$  is

$$l(\mu, \xi, \sigma) = -m \log \sigma - (1 + 1/\xi) \sum_{i=1}^m \log \left[ 1 + \xi \left( \frac{z_i - \mu}{\sigma} \right) \right] - \sum_{i=1}^m \left[ 1 + \xi \left( \frac{z_i - \mu}{\sigma} \right) \right]^{-1/\xi}$$

For  $1 + \xi \left( \frac{z_i - \mu}{\sigma} \right) > 0$ , for  $i = 1, \dots, m$

And when  $\xi = 0$  is

$$l(\mu, \sigma) = -m \log \sigma - \sum_{i=1}^m \left( \frac{z_i - \mu}{\sigma} \right) - \sum_{i=1}^m \exp \left\{ - \left( \frac{z_i - \mu}{\sigma} \right) \right\}$$

Maximization is obtained using standard numerical optimization algorithms.

A  $(1 - \alpha)$  confidence interval for the return period can be found through a parametric bootstrap approach (Davison & Hinkley 1997). Simulate a sample of  $n_i, i = 1, \dots, m$  values from the fitted GEV distribution with MLE parameters,  $\hat{\mu}, \hat{\sigma}, \hat{\xi}$ . Refit the GEV model to this bootstrapped sample and estimate the return period based on the original 1995 level,  $z_p$ . Repeat the procedure a large number of times. An approximate confidence interval for the return period is found by selecting the bootstrapped values of return period that satisfy the  $\alpha/2$  and  $(1 - \alpha/2)$  percentiles.

## S2: Supplementary Tables and Figures

**Table S1:** Parameter estimates, return period estimates, and 95% confidence interval for return period under a 30d drought.

| Duration (d) | $\hat{\mu}$ | $\hat{\sigma}$ | $\hat{\xi}$ | Return period (y) | 95% CI for return period (y) |
|--------------|-------------|----------------|-------------|-------------------|------------------------------|
| 30           | 140.43      | 38.30          | -0.451      | 20.28             | [12.4,97.0]                  |

**Table S2:** Expected, minimum, and maximum volumes of water (in millions of cubic meters) for  $\delta = 1\%$  and  $5\%$  risk of salinity intrusion

| $\delta$ | Water Volume (million m <sup>3</sup> ) |             |                                    |             |                                   |     |     |
|----------|----------------------------------------|-------------|------------------------------------|-------------|-----------------------------------|-----|-----|
|          | Expected volume for base-line          | 95% CI      | Expected volume for counterfactual | 95% CI      | Expected increase due to dredging | Min | Max |
| 1%       | 1061                                   | [1028,1098] | 1437                               | [1369,1505] | 376                               | 271 | 477 |
| 5%       | 883                                    | [855,907]   | 1179                               | [1133,1225] | 296                               | 226 | 370 |

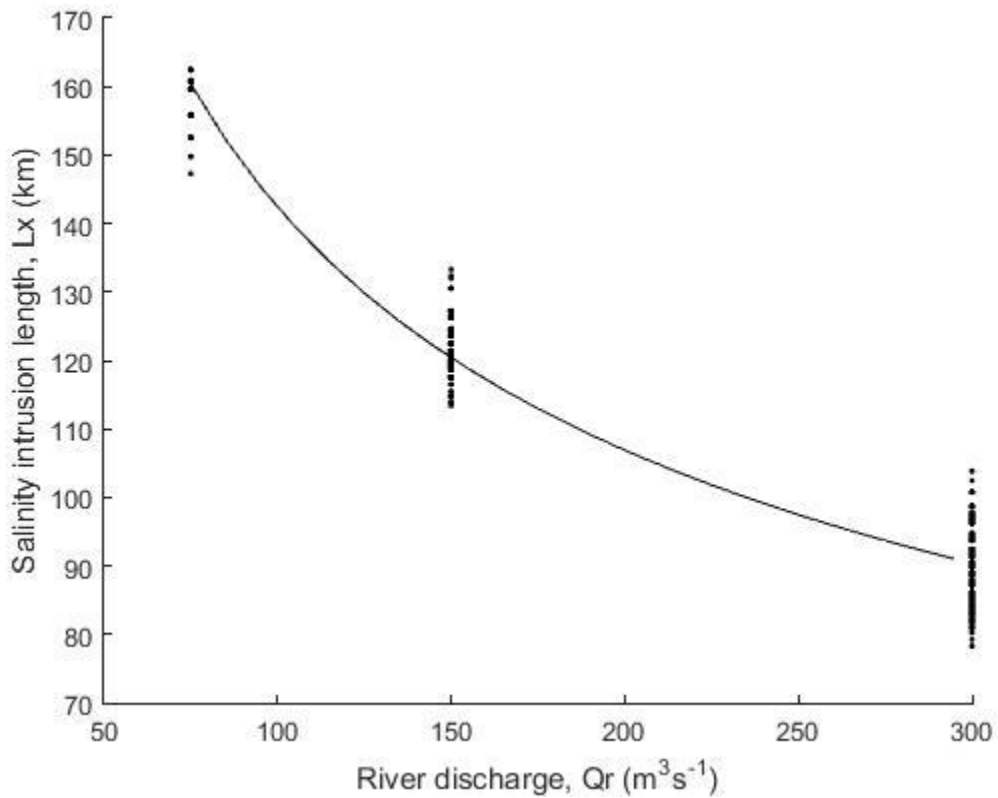

**Fig. S1** The simulated position (km), upstream of Upper NY Harbor, of a salinity threshold of 0.324 PSU in relation to Hudson River discharges, shown for the river's 1995 (pre-dredged) bathymetry. The salinity intrusion length,  $L_x$ , was fitted using a power law to Hudson River discharges,  $Q_r$ , as simulated by a ROMS hydrodynamic model at flows of  $75m^3s^{-1}$ ,  $150m^3s^{-1}$ , and  $300m^3s^{-1}$ . Observations at each level of discharge comprised tidal variations in the ROMS model output.

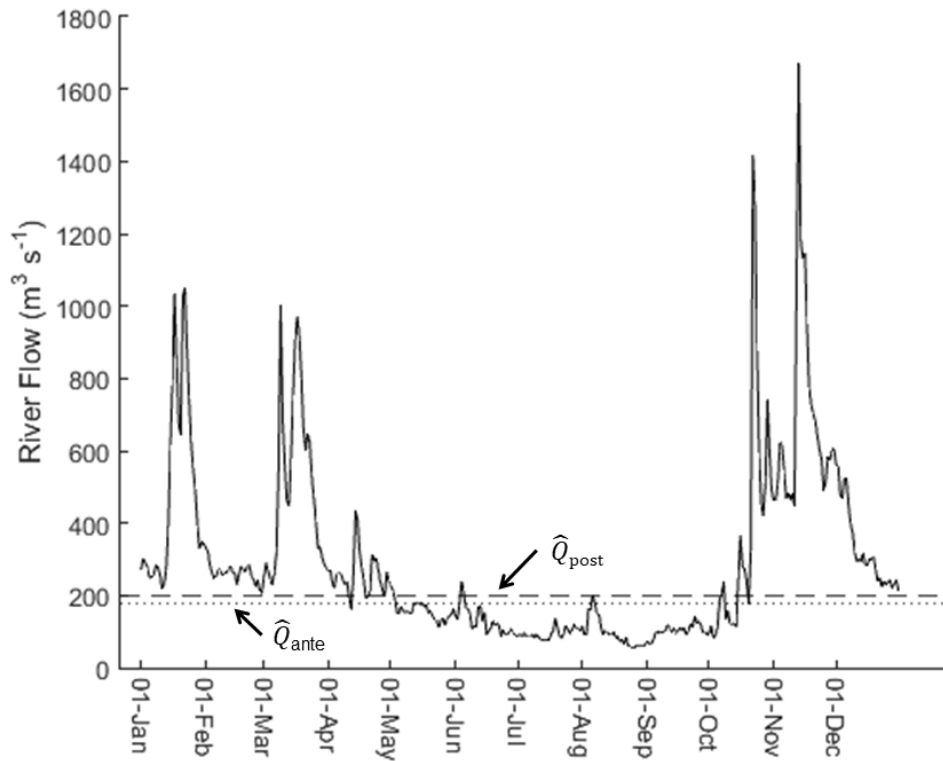

**Fig. S2:** Observed daily river flow ( $\text{m}^3 \text{s}^{-1}$ ) during 1995 from the Green Island gauge, immediately upstream of the Troy Lock and Dam on the Hudson River ( $42^\circ 45' 08'' \text{N}$ ,  $73^\circ 41' 20'' \text{W}$ ). The difference between  $\hat{Q}_{\text{post}}$  (dotted line) and  $\hat{Q}_{\text{ante}}$  (dashed line) is the estimated additional water required to be released from Great Sacandaga Lake under the counterfactual a deepened channel in 1995).

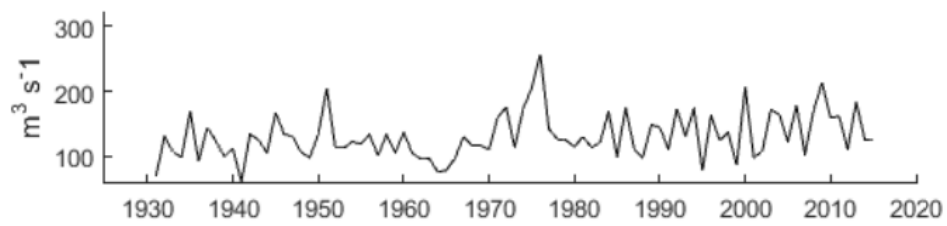

**Fig. S3:** Annual minima for transformed Hudson River flow data for  $r = 30d$ , constituting historical occurrences of a 30d drought.

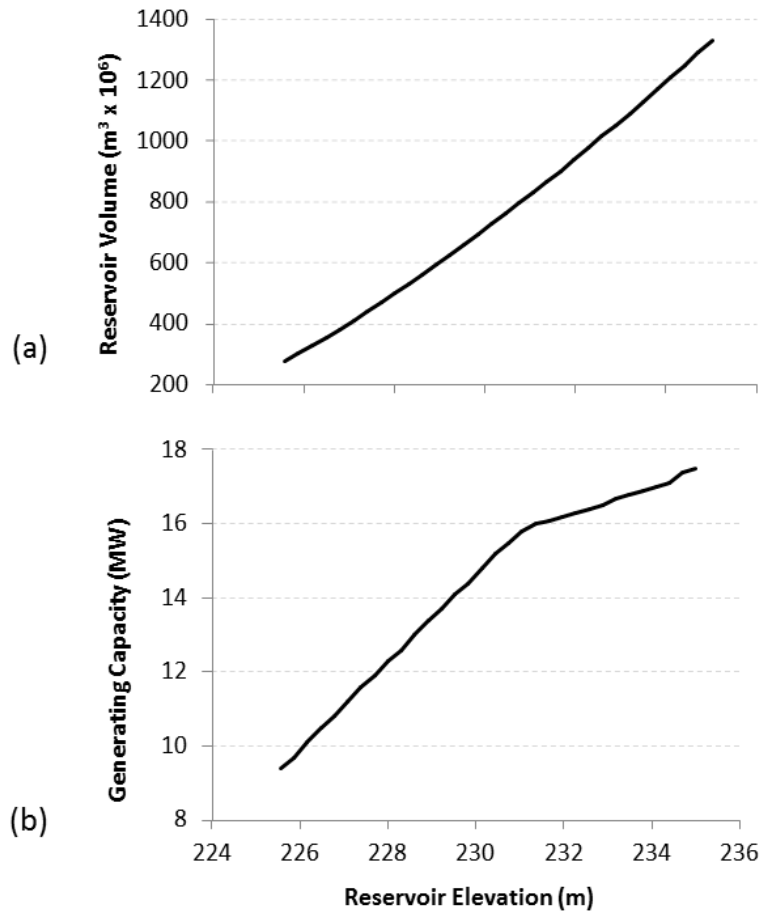

**Fig. S4:** (a) Great Sacandaga Lake elevation-volume relationship; (b) Great Sacandaga Lake and Conklingville Dam (E.J. West hydropower facility) generating capacity-elevation relationship. Source: ORNL (2011).



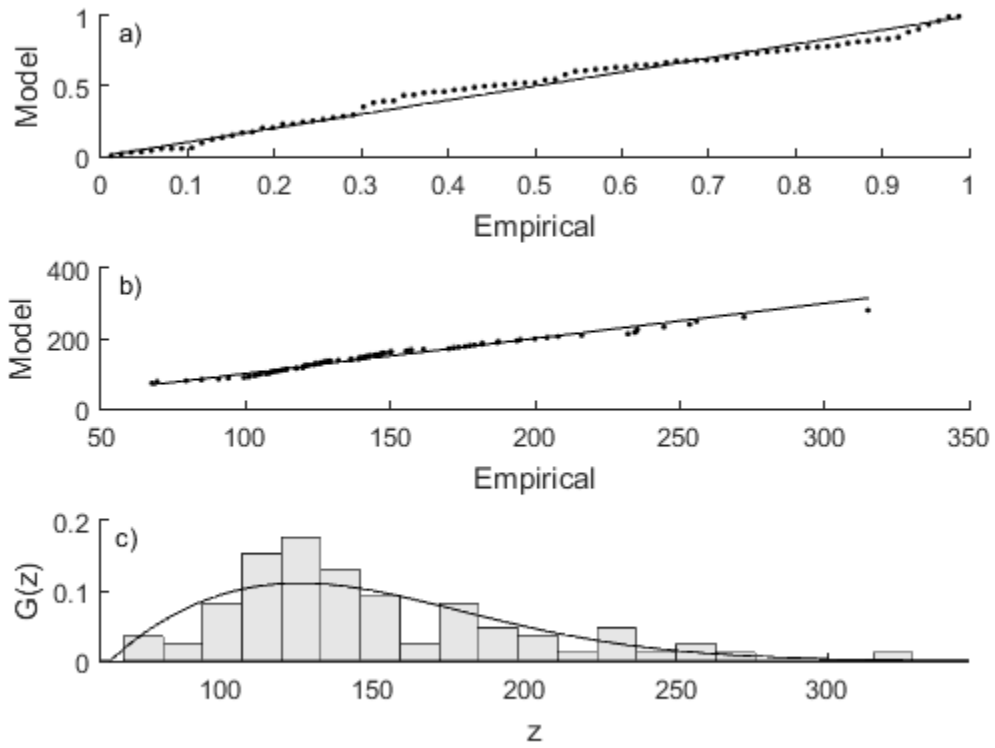

**Fig. S5:** Diagnostic (a) probability; ( b) quantile; and (c) density plots for the GEV fit for a 30d drought.

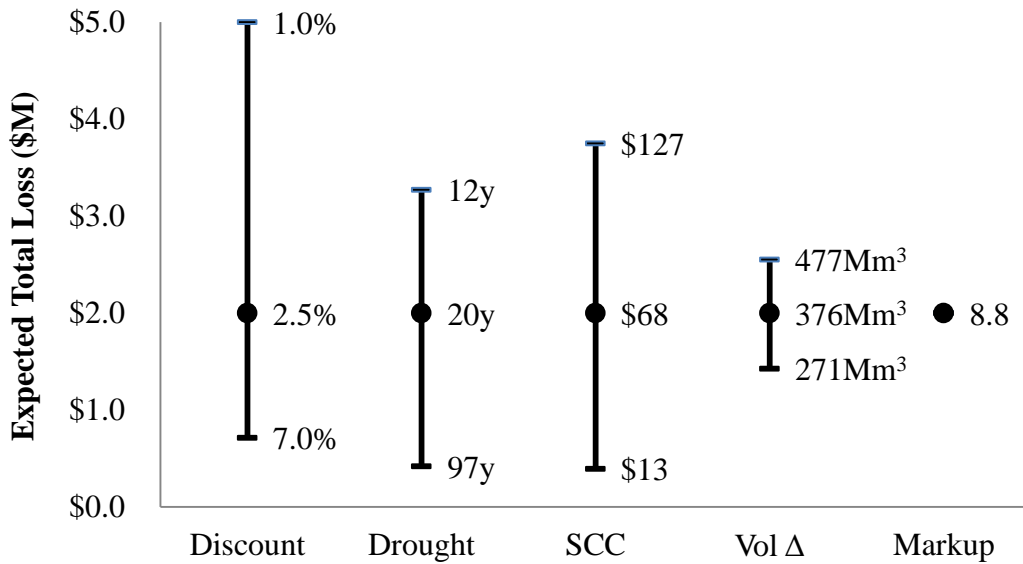

**Fig. S6:** Ranges of estimates of expected present value of total loss (2018 \$M) under the counterfactual. Social discount rate (Discount; %); odds ratio representing expected years between droughts (Drought; y); social cost of carbon (SCC; 2018 \$); expected augmented water release (Vol Δ; Mm<sup>3</sup>); ratio of load-based marginal price of electricity in NY State Electricity Zone J (a proxy for the marginal cost of replacement electric power) to the average operating and maintenance costs of hydropower (Markup; unitless). Estimates for each parameter range were undertaken with all other parameters at their central values.
